# Supplementary material for: First complete pterosaur from the Afro-Arabian continent: insight into pterodactyloid diversity
Source: PubMed Central journal article supplement (PMC6884559; doi:10.1038/s41598-019-54042-z), 2019-11-29
Supplement: 41598_2019_54042_MOESM1_ESM.pdf [file 41598_2019_54042_MOESM1_ESM.pdf]

## SUPPLEMENTARY INFORMATION

### **First complete pterosaur from the Afro-Arabian continent: insight into pterodactyloid diversity**

Alexander W. A. Kellner<sup>1\*</sup>, Michael W. Caldwell<sup>2</sup>, Borja Holgado<sup>1,3</sup>, Fabio M. Dalla Vecchia<sup>3</sup>, Roy Nohra<sup>4</sup>, Juliana M. Sayão<sup>5</sup> & Philip J. Currie<sup>2</sup>

<sup>1</sup>Laboratory of Systematics and Taphonomy of Fossil Vertebrates, Departamento de Geologia e Paleontologia, Museu Nacional/Universidade Federal do Rio de Janeiro, Quinta da Boa Vista s/n, São Cristóvão, Rio de Janeiro, 20940-040 Brazil. <sup>2</sup>Department of Earth and Atmospheric Sciences, University of Alberta, Edmonton, Alberta, T6G2E9 Canada. <sup>3</sup>Institut Català de Paleontologia ‘Miquel Crusafont’ (ICP), C/ de les Columnes, Universitat Autònoma de Barcelona, Cerdanyola del Vallès, Catalonia, E08193 Spain. <sup>4</sup>Expo Hâqel, Hâqel, Main Road, Byblos, Mount Lebanon, 14014354 Lebanon. <sup>5</sup>Laboratório de Biodiversidade do Nordeste, Centro Acadêmico de Vitória, Universidade Federal de Pernambuco, Vitória de Santo Antão, Pernambuco, Brazil. Correspondence and request for materials should be addressed to A.W.A.K. (email: [kellner@mn.ufrj.br](mailto:kellner@mn.ufrj.br))

**Supplementary Table S1.** Measurements of some skeletal elements of *Mimodactylus libanensis* gen. et sp. nov. The length of the preserved part is reported for the incomplete elements; the abbreviations 'l' and 'r' represents respectively left and right.

| <b>Element (measured distance)</b> | <b>Measurement (in mm)</b> |
|------------------------------------|----------------------------|
| skull (length)                     | 99 (preserved)             |
| lower jaw (length)                 | 105 (preserved)            |
| Scapula (length)                   | 29 (r)                     |
| Coracoid (length)                  | 31 (r)                     |
| humerus (length)                   | 52 (r)                     |
| humerus (dpc length)               | 16                         |
| ulna (length)                      | 84 (r)                     |
| pteroïd (length)                   | 53 (l) / 52 (r)            |
| 1st wing phalanx (length)          | 114 (l) / 128 (r)          |
| 2nd wing phalanx (length)          | 117 (l) / 119 (r)          |
| 3rd wing phalanx (length)          | 103 (l) / 105 (r)          |
| 4th wing phalanx (length)          | 89 (l) / 92 (r)            |
| femur (length)                     | ~36 (preserved)            |
| tibiotarsus (length)               | 60                         |

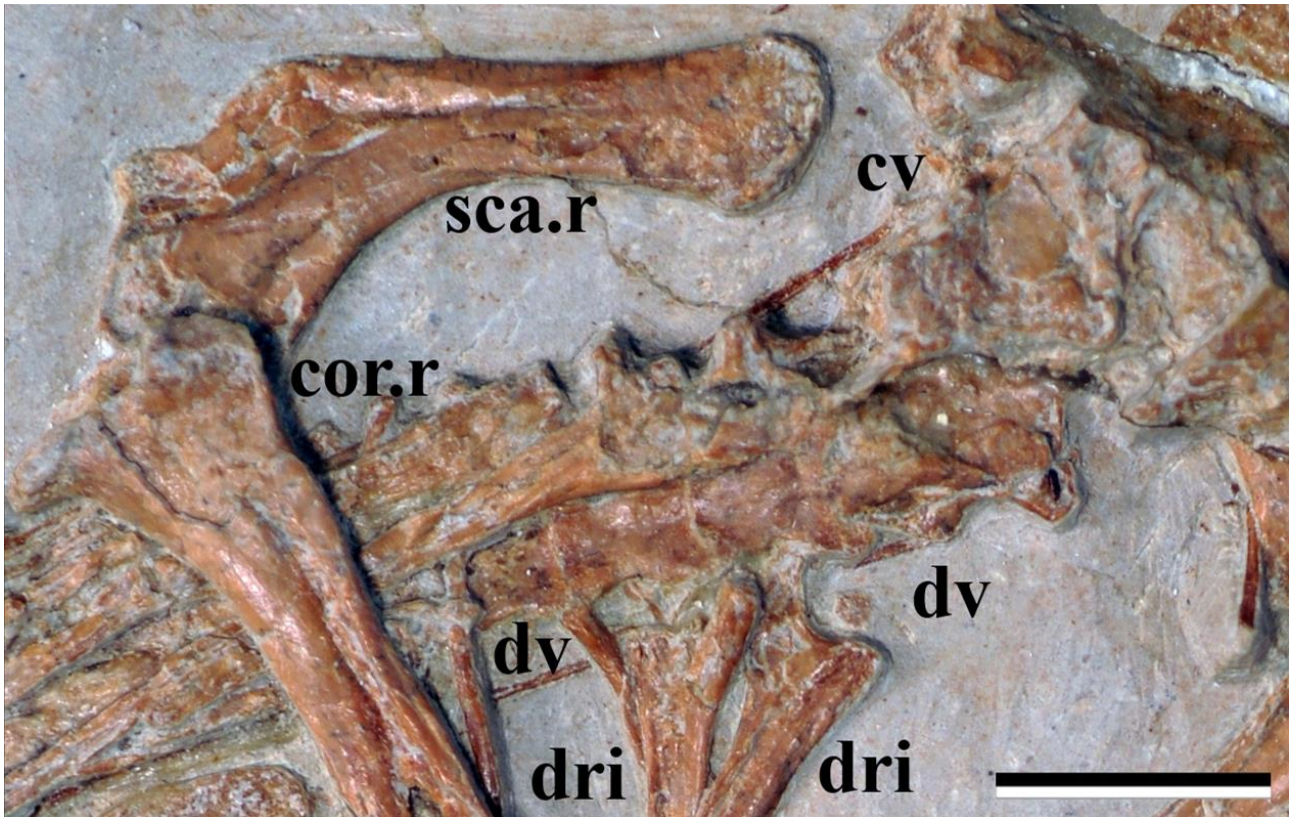

**Supplementary Figure S1.** Detail of the dorsal vertebrae and dorsal ribs close to the right scapula and coracoid. Scale-bar: 10 mm. Abbreviations. cor.: coracoid; cv: cervical vertebrae; dri: dorsal ribs; dv: dorsal vertebrae; l: left; r, right; sca.: scapula.

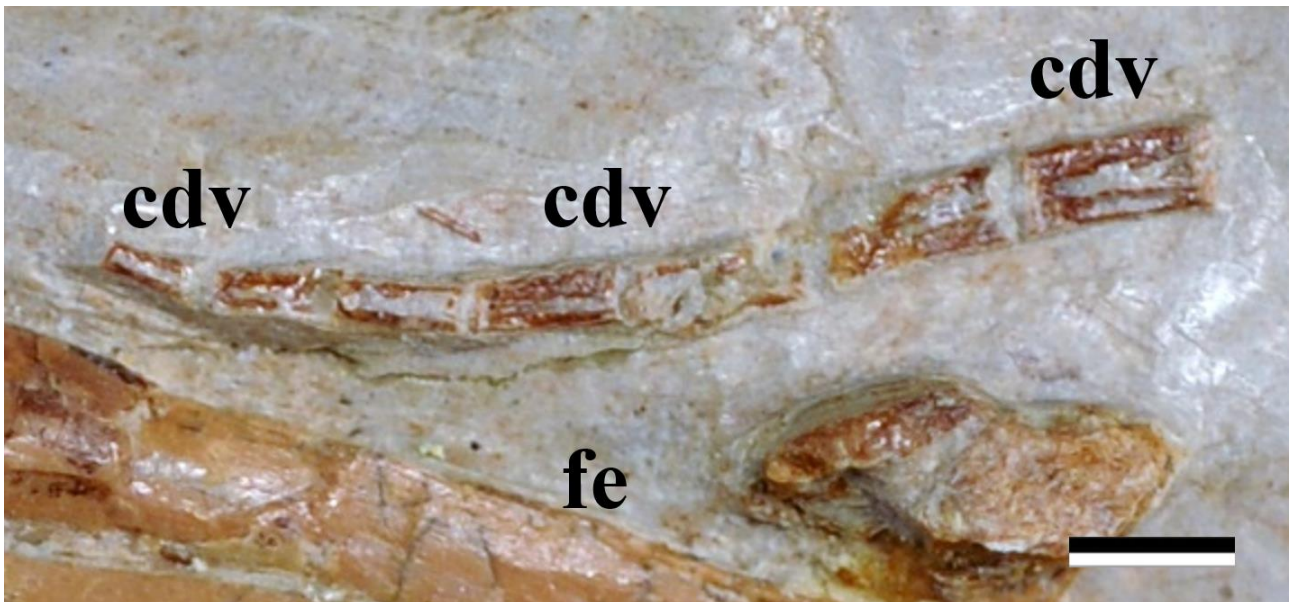

**Supplementary Figure S2.** Detail of the segment of caudal vertebrae. Scale-bar: 1 mm. Abbreviations. cdv: caudal vertebrae; fe: femur.

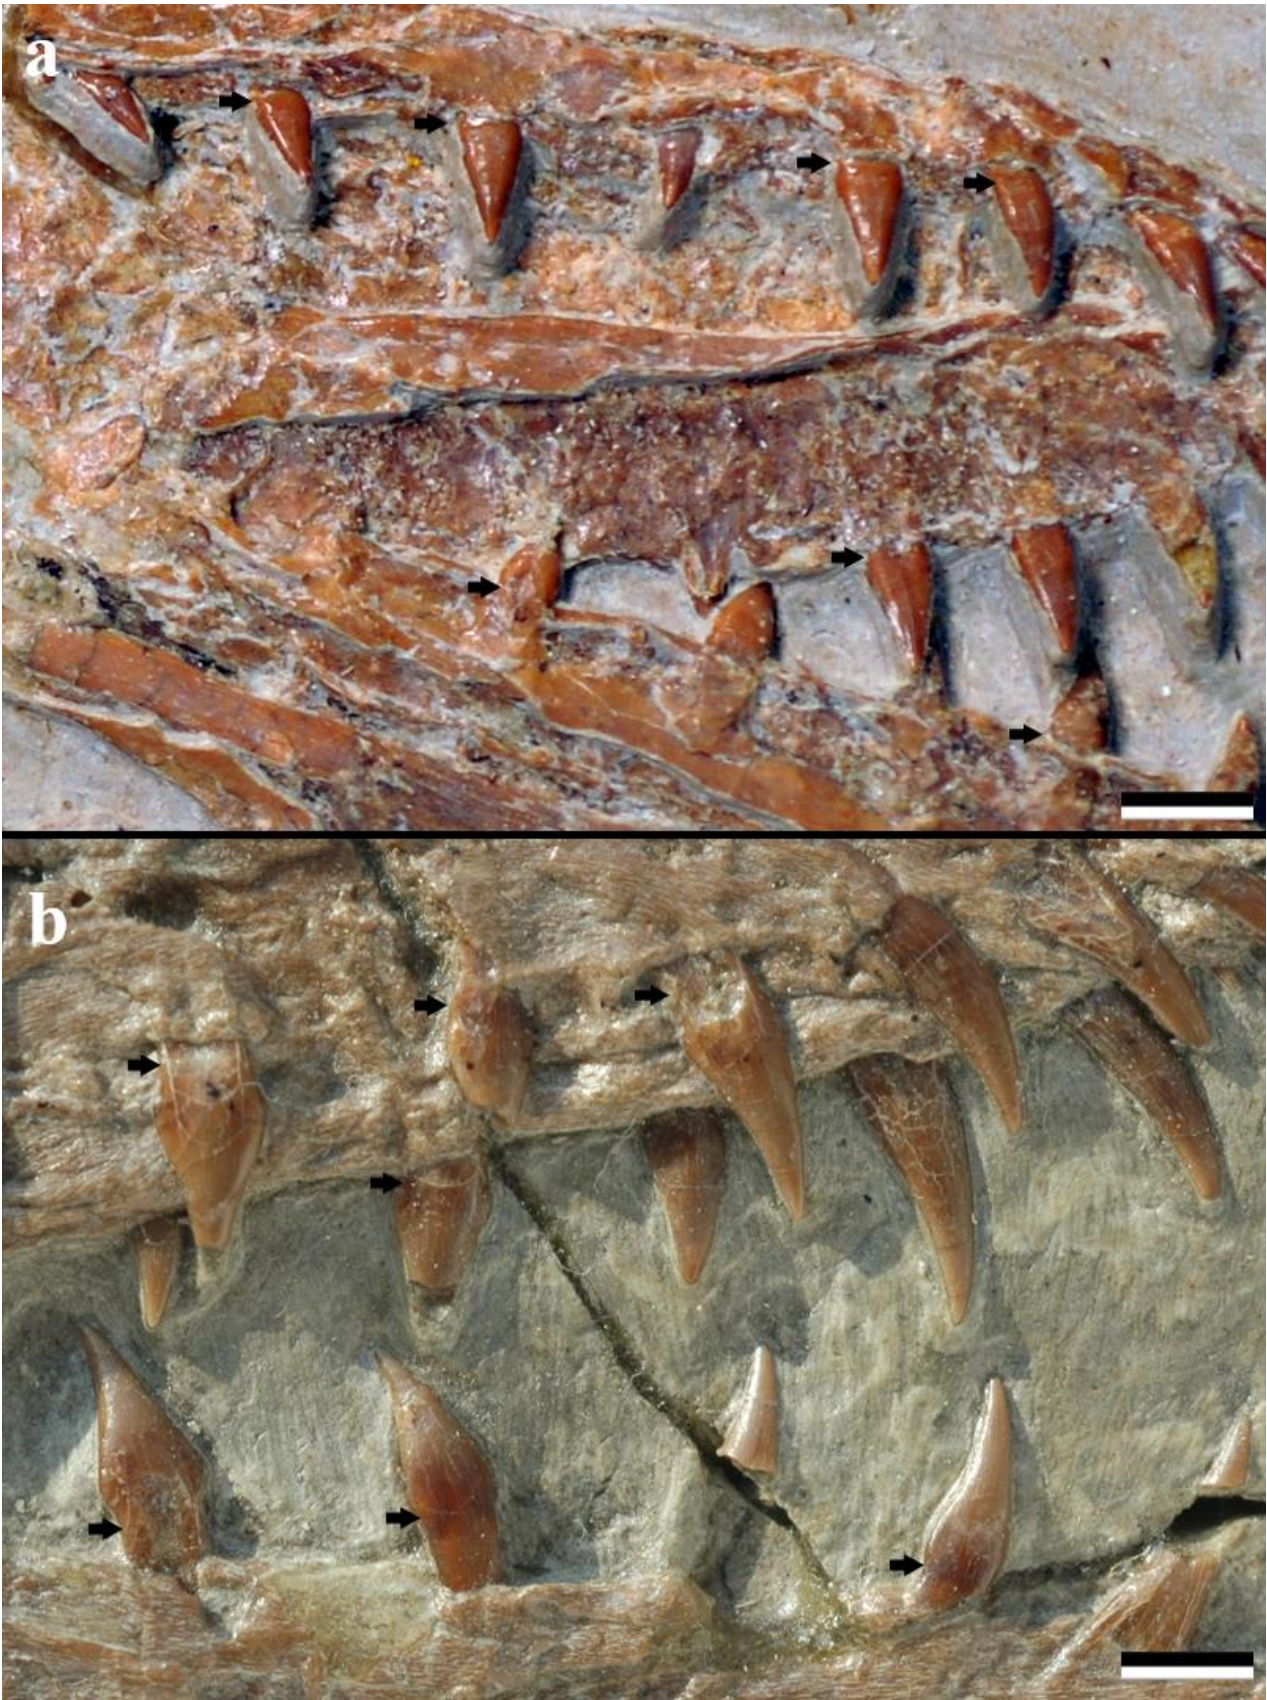

**Supplementary Figure S3.** Teeth comparison of *Mimodactylus libanensis* (a) with *Haopterus gracilis* (b). Scale-bar: 1 mm. Arrows point to the cingulum at the base of the teeth.

## Phylogenetic analysis

In order to establish the phylogenetic position of *Mimodactylus libanensis* gen. et sp. nov., a phylogenetic analysis was performed using TNT 1.5<sup>69</sup> using the TBR heuristic searches by maximum parsimony. Characters were given equal weight and treated unordered. This analysis is based essentially on Holgado et al.<sup>34</sup>. We added the pteranodontoid *Linlongopterus jennyae* and the istiodactylid *Liaopterus brachyognathus* due to the possible relationships with *Mimodactylus libanensis*, as well as the recently published tapejaromorph *Keresdrakon wilsoni*<sup>35</sup>. We also added five further characters: three modified from previous works<sup>22,26-27</sup> (characters 27, 76, and 94; for the description see the character list below) and two new characters (characters 86 and 98; see their description in the character list below). The description of character state 95(1) and character 97 have been modified respect to Holgado et al.<sup>34</sup>. Search for the most parsimonious trees (MPTs) was conducted via Traditional Search (TBR swapping algorithm), 10000 replicates, random seed and collapsing trees after search. The search conducted by TNT including all of the three non-pterosaur outgroups (*Ornithosuchus woodwardi*, *Herrerasaurus ischigualastensis* and *Scleromochlus taylori*) produced 12 most-parsimonious trees (MPTs) with a length of 360 steps (consistency index = 0.650; retention index = 0.871) (the strict consensus tree is shown in the Supplementary Fig. S4). Subsequently, we excluded the wildcard taxa *Linlongopterus jennyae* and run the analysis with the same parameters, obtaining six most-parsimonious trees (MPTs) with a length of 359 steps (consistency index = 0.652; retention index = 0.872) (the strict consensus tree is shown in the Supplementary Fig. S5).

An analysis via New technology was also performed using Sect. Search, ratchet (parameters: 20 substitutions made, or 99% swapping completed, six up-weighting prob., six down-weighting prob., and a total number of iterations of 10), tree fusing, Driven search (15 initial addseqs., 15 times of min. length), random seed, and without collapsing trees after search.

Strict consensus of 12 trees (0 taxa excluded)

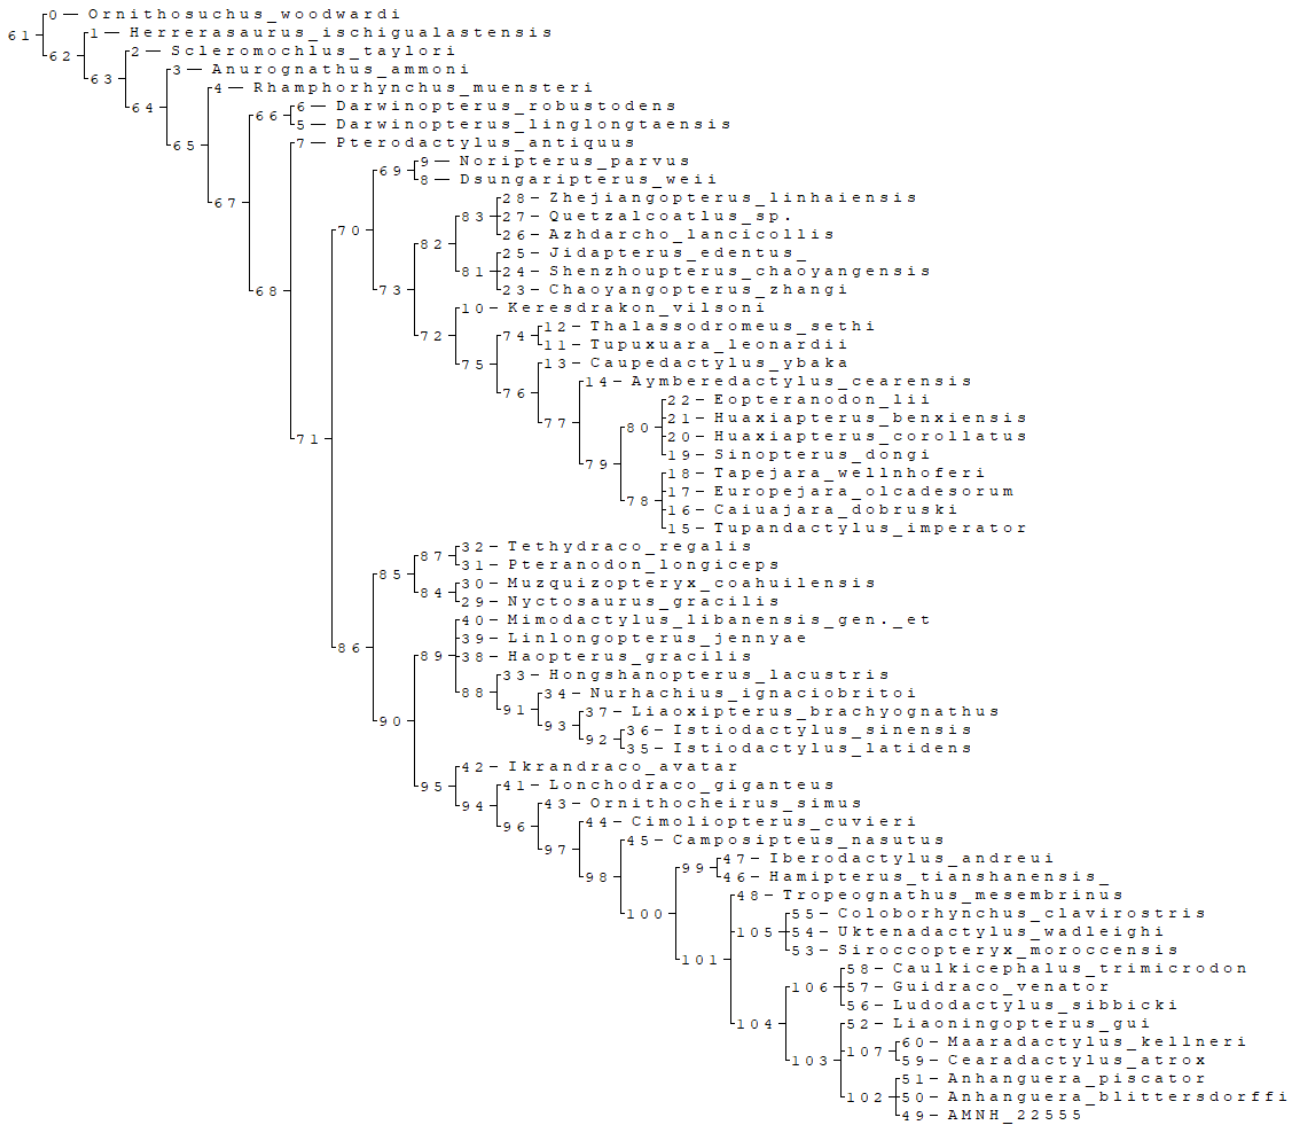

**Supplementary Figure S4.** Phylogenetic relationships of *Mimodactylus libanensis* gen. et sp. nov.

within Pterosauria. Strict consensus of 12 most-parsimonious trees (MPTs) with a length of 360 steps (consistency index = 0.650; retention index = 0.871).

Strict consensus of 6 trees (1 taxa excluded)

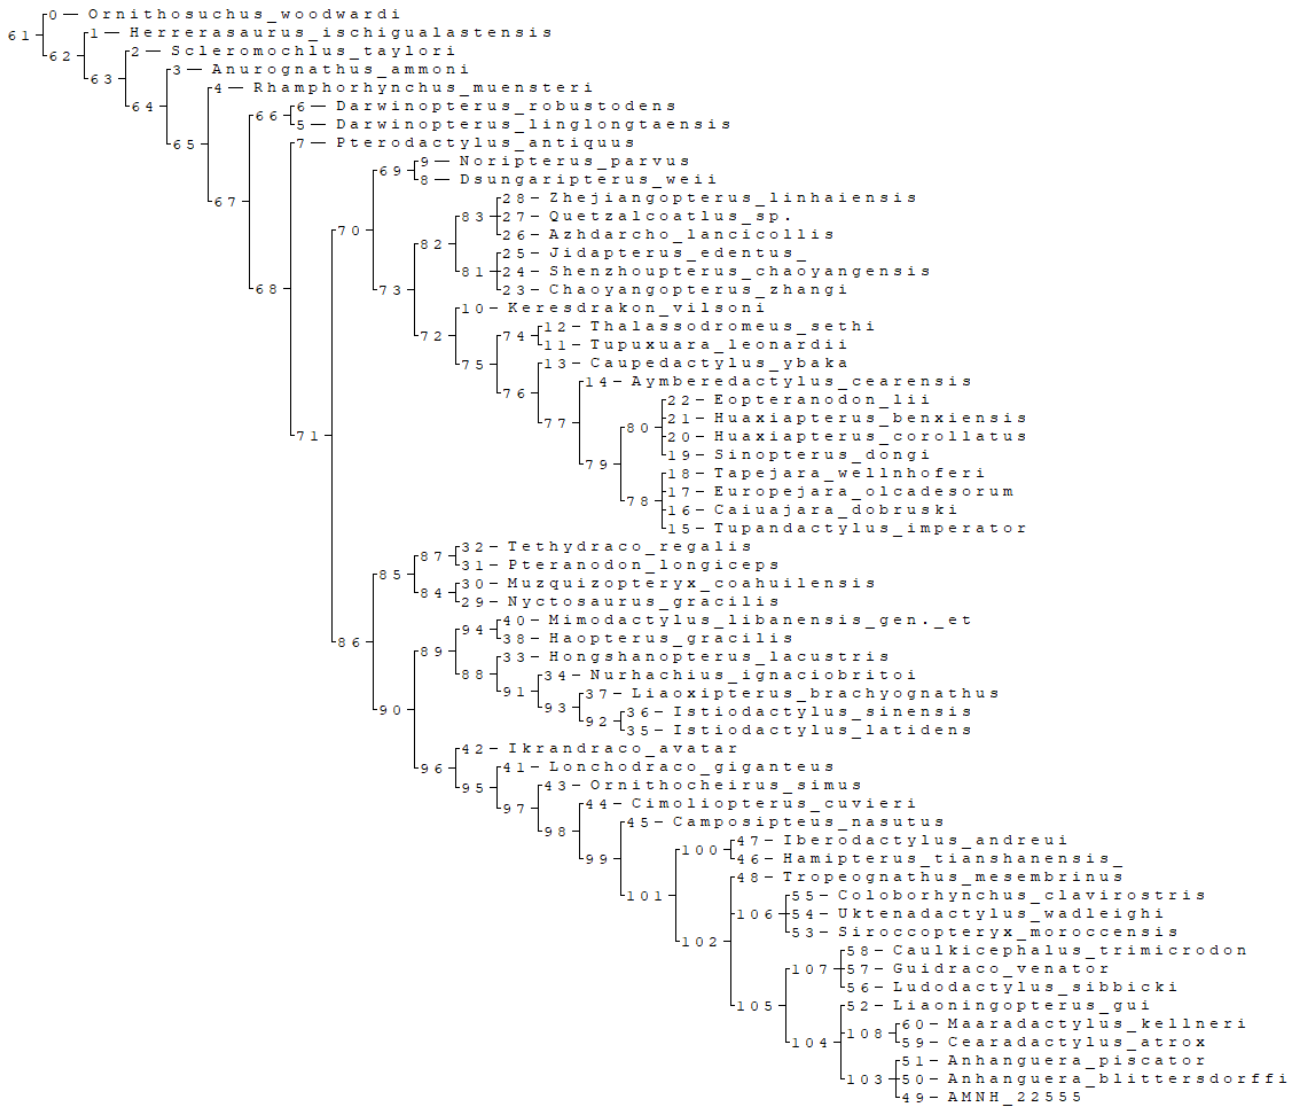

**Supplementary Figure S5.** Phylogenetic relationships of *Mimodactylus libanensis* gen. et sp. nov.

within Pterosauria, after the exclusion of the wildcard taxon *Linlongopterus jennya*. Strict consensus of 6 most-parsimonious trees (MPTs) with a length of 359 steps (consistency index = 0.652; retention index = 0.872).





Pterodactylus\_antiquus 1010000000011??0???0001000000-00000--00--00-

1001000010031?00--0-10?00000???2010000--

0000010001010000000000002110010000001000121100500?2100?1003122222020

Dsungaripterus\_wei 10100001011110410200001200000-0100111000010-?---

0000100211012211011101001012012000--11012--

011000000000001111100110?000???0?2210??5?0031001??131222?2120

Noripterus\_parvus 1010000101111?????0001200000-0100111000010-?---

000010021?01221101?10?00?0?2012000--?1012--

011000000000000?11?0?0?????????????????????0?001?????????????

Keresdrakon\_vilsoni 101?????????????????00?1200000-?00?0--00--?0-

?????????????2?????????????0000???301200101?3-----

?111?00?????00020011?0?01520??1??????????????????

Tupuxuara\_leonardii 10110020020310510210001200100-0000134000000-

?????0011002210127110110030010130120011313-----

11111001???00002001?21001520131001?01313???2???

Thalassodromeus\_sethi 1011002002031?610210001200100-0000134000000-

1110000110022101271101100300101?0120011313-----

????????????????????????????????????????????????????????

Caupedactylus\_ybaka 1011002002031?510210021210100-0000134000000-

?????00?210221?12711011?000010130120011013-----

?????????????00002001?????015200????????????????????

Aymberedactylus\_cearensis

?????????????????????00??21?????????????????????????????????????????????????????????2012001

1?13-----????????????????????????????????????????????????????????

Tupandactylus\_imperator 1011002002031?????102121?100-0000133100000-

?????0110?22?01221101???0???201210112?3-----

????????????????????????????????????????????????

Caiujara\_dobruski 1011002002031?????1021211100-?000133100000-

???????1?00220?1221101101001??120121011213-----

?1111000?0?00002?01?21?11520?31??120???????????

Europejara\_olcadesorum

?????2??031??????0??????????????????????0????????????220?12??0??????1?1201?10

112?3-----????????????????????????????????????????

Tapejara\_wellnhoferi 101100200203102????1021211100-0000133000000-

?????1011002200122110110100110120121011213-----

?1111000?0?00002001?2101152003100120?31????2120

Sinopterus\_dongi 1011002002031?????1021211000-1000133000000-

1100010110022?11211101?0??01???20121011013-----

?1?11000???0000200??211?152??3100?20?31222321??

Huaxiapterus\_corollatus 101????????????????102121?000-1000133010000-

??????????0????????????????01???01210110?3-----

?1?11??0???000??0??211??5???3??????31322321??

Huaxiapterus\_benxiensis 1011002002031?????102121?000-1000133010000-

???????110022??1211101????01???201210110?3-----

?1?11??0????????????2????????3????20?31222?2120

Eopteranodon\_lii 101??0???2????????1021211000-100013300?00-

????????????????????????????????012001???3-----

??????????????????21??5???2??????3?222?2???

Chaoyangopterus\_zhangi 101??1?0????????????001120?000-?00????00--00-

????????????????1????????????00????012000--?3-----

?102110????000???10?200??????3100?20?31322?21?0

Shenzhoupterus\_chaoyangensis 1010012002031?????001120?000-0001155000000-

?????0??2???2?01241101????00???2012000--?3-----

?1021?????0?0???1??200??5???3100????31222321??

Jidapterus\_edentus\_ 101????????????????0011200000-?001???00--00-

?????????????????????????????0????3012000--13-----

?1?2110?????0???1??200??5?0?3100????3122232120

Azhdarcho\_lanicollis ?????????????????????00??2?000???0?????0?--?0-

????????????????1????????????0?0??????????????3-----

11031221????????????????015?0????????????????????

Quetzalcoatlus\_sp. 10100020020????????0001200000-?00014?00--00-0---

000010??210?????????000010?3012000--13-----

11031221?0?00002010?20?01520031001???41322?2?20

Zhejiangopterus\_linhaiensis 10100020020?1?????0001200000-00000-----00-0---0000100?2?00--

0-01??0?00???012000--?3-----1??31221?0?000???10?200??5???3100?20?413???2???

Nyctosaurus\_gracilis 10101000000110100100012200000-00000-----00-????00011021100--

1200?000001013012000--13-----

11?110111000?00100013110130?03111221232222?20??

Muzquizopteryx\_coahuilensis ?01010?000011???????0?????????0?00????????00-

?????0001?021?00--1200????0????????????0???3-----

???11011????1????????11??30???111?21????????1??

Pteranodon\_longiceps 10100020000111302310012200000-00000-----00-

112?0000110231012311001000001013012000--03-----

1111101110111012000121101411131112202322232020

Tethydraco\_regalis

????????????????????????????????????????????????????????????????????????????????????????

????????????????????????????????????????????????????????????014111???????????????????

Hongshanopterus\_lacustris ??????????????03011000?1100?0-?0??????--

0????????????????1?????00?0100101??????????210000001100120000001?11101???????????????

????????????????????????????????

Nurhachius\_ignaciobritoi 10110020?10?1?????0001100010-00000-----00-??1?01111033000-

-?????0300?0?2111000--

?22000000110012000000??111011???1?10200?2211?041??22112??1312???21??

Istiodactylus\_latidens 1011000111111?????0000000010-00000-----00-11100011211330?0--0-

001?0?00?011110000--

?22000000110012100000?111?011???111020002?1?10411??2112????????????????

Istiodactylus\_sinensis 1011000111111?????0000000010-00000-----00-?????011211330?0--0-

00?00300???111?000--

?220000001100121000001??11??1???1?1??0?21??4??2211??131222??1??

Liaopterus\_brachyognathus

?????????????????????0?0?????????????????????????????????????????????????????????0????1?10000

--?22?00000110012000000????????????????????????????????????????????????????????????

Haopterus\_gracilis 1010?????????????????0001100000-?0000-----00-

?????0?????????????????????0??12111?00--

021001000111011000000??11?0?0??111?1?0?22??04??221?????3?222??20

Linlongopterus\_jennyae 101000?0000?1?????0001100000-00000-----00-

??????11?0311??????????0????1?11000--

?21001000101011000000????????????????????????????????????

Mimodactylus\_libanensis\_gen.\_et\_sp.\_nov.????????????030??000??100000-?0??????????0-

??????????????????00??01001011111000--

?21001000111011000000??????0?00111?1?002211?4???2211?2013222221??

Lonchodraco\_giganteus 1??????????????????00??100000-

?0??1??0000????????????????????????????010?????110?01?0?????1000101000000001???????????

????????????????????????????????????

Ikrandraco\_avatar 10100000000110????10001100000-00000-----00-11001?01000311?0--0-

00?00100101211000112?0000100010100?0000001111101?????????????2????41??22112201??2??

?????

Ornithocheirus\_simus10??????????????????0?000?00-

?0????????????????????????????????????0?0?????????????00?0100010000001100???????????????

????????????????????????????????????

Cimoliopterus\_cuvieri 1?????????????????????0??000010-

?0??1?20000????????????????????????011?????????????00?0?000??0000??0000???????????????

????????????????????????????????????

Camposipteus\_nasutus

1??????????????????????0?00001100?????????00????????????????????????011???????????

????00?0?000??0000??0000????????????????????????????????????????????????

Hamipterus\_tianshanensis\_ 10100020000?1011011000100001100000121001100-

?????001010211?0--0-001001101012010000--

1000011001000000110001111101????1?????00????10410022?12?0?????????????

Iberodactylus\_andreui

????????????????????0?000?110?0??1?10011????????????????????011??????????

????????110010000001100????????????????????????????????????????????

Tropeognathus\_mesembrinus 101000200001101001100?100001100000102000000-

?????01001021101001000100210101101000101000011?00100000011010?1111011????11??002?

?????10?211??????????????

AMNH\_22555 10101020000110100110011000012?0000102000000-

1100101011021101001000100110101????001?10000111101000000110101111101?1??21112100?

???104110?2112??1??????????

Ananguera\_blittersdorffi 1010102000011010011001100001200000102000000-

?????01011021101001000100110101?????0101?00011110100000011010????????????????????

????????????????????

Ananguera\_piscator 1010102000011?1????001100001200000102000000-

1100101011021101001000100?101012010001010000111101000000110101111101?10121112100

221110411022112??1??????2120

Liaoningopterus\_gui

101?0?2000011??????0?0000120?00?1020000?????????0110211?????????0110?????0?

0??101000011110100000011010111?1????????????????????????????????????????

Siroccopteryx\_moroccensis

1????????????????????0??3000112?0??1??0000????????????????????????011??????????

????0????1001000000?010????????????????????????????????????????????

Uktenadactylus\_wadleighi

1????????????????????0??3000112?0?????0000????????????????????????011??????????

????0????100?0?000??010????????????????????????????????????????????

Coloborhynchus\_clavirostris

1?????????????????0?3000112?0????0000????????????????????011?????????

????0????100??000??010????????????????????????????????????????

Ludodactylus\_sibbicki 10100000000110????001100001??0000??000000-

1100101001021101161100?00110??1201000101?00011110100000011110????????????????

????????????????????

Guidraco\_venator 10?0000000011????001100001??0000??000000-

????0?0010211?1161100?00?10?0?201000?--

?00011110100000011110?1111????????????????????????????????????

Caulkicephalus\_trimicrodon

10????0?0?0?????????01?000?12?00??1020000?????????????????11611????011??0?????

????0000??110????00????1????????????????????????????????????????

Cearadactylus\_atrox

10100??0010?101????0?11000?120?00?1020000????00??1011?211?????????011010?20

10000--00001111010000001101????????????????????????????????????

Maaradactylus\_kellneri

101?0?2001011??????0?0000?20?00?1020000?0?1?????0110211?1??????0110?????

0??10100001111010000001101????????????????????????????????????

;

cnames

{0 External\_naris\_(or\_nasoantorbital\_fenestra),\_position\_relative\_to\_the\_premaxilla\_

main\_part\_dorsal\_to\_the\_ventral\_margin\_of\_the\_premaxilla

main\_part\_displaced\_posterior\_to\_the\_premaxilla;

{1 External\_naris,\_dorsoventrally\_compressed absent present;

{2 External\_naris\_and\_antorbital\_fenestra\_configuration\_separated

confluent,\_forming\_a\_nasoantorbital\_fenestra;

{3

External\_naris\_and\_antorbital\_fenestra\_(or\_nasoantorbital\_fenestra),\_ventral\_margin\_length\_relati  
ve\_the\_skull\_length shorter\_than\_40%\_of\_the\_skull\_length\_

longer\_than\_40%\_of\_the\_skull\_length;

{4 Antorbital\_(or\_nasoantorbital)\_fenestra,\_posterior\_margin,\_shape\_ straight\_ concave\_;

{5 Nasoantorbital\_(or\_antorbital)\_fenestra\_extending\_dorsal\_to\_the\_orbit\_ absent present;

{6 Orbit,\_shape\_ subcircular quadrangular\_(broad\_base) piriform\_(dorsoventrally\_elongated)\_;

{7 Orbit,\_comparatively\_small absent\_ present\_;

{8 Ventral\_margin\_of\_the\_orbit closed open;

{9 Orbit,\_position

middle\_of\_the\_skull,\_with\_the\_ventral\_margin\_of\_the\_orbit\_below\_the\_middle\_of\_the\_antorbital  
\_(or\_nasoantorbital)\_fenestra\_and\_the\_dorsal\_margin\_of\_the\_orbit\_above\_the\_dorsal\_margin\_of\_  
the\_antorbital\_(or\_nasoantorbital)\_fenestra

high\_in\_the\_skull,\_with\_the\_ventral\_margin\_of\_the\_orbit\_the\_same\_level\_or\_above\_the\_middle\_  
of\_the\_antorbital\_(or\_nasoantorbital)\_fenestra

low\_in\_the\_skull,\_with\_the\_entire\_orbit\_lower\_than\_the\_dorsal\_margin\_of\_the\_antorbital\_(or\_na  
soantorbital)\_fenestra;

{10 Suborbital\_opening absent\_ present\_;

{11 Lower\_temporal\_fenestra,\_shape

comparatively\_broad,\_with\_extensive\_subhorizontal\_ventral\_margin

piriform,\_with\_dorsal\_portion\_wider\_than\_ventral\_\_

piriform,\_with\_ventral\_portion\_wider\_than\_dorsal\_reduced\_(slit-like);



{12 Lower\_temporal\_fenestra,\_position\_relative\_to\_orbit posterior\_to\_orbit  
reaches\_under\_posterior\_margin\_of\_orbit;

{13 Choanae,\_separation separated\_by\_vomer confluent;

{14 Postpalatine\_fenestra,\_shape quadrangular/subtriangular oval egg-shaped elongated\_egg-  
shaped\_kite-shaped,\_rounded\_margin elliptical reduced,\_slit-like;

{15 Secondary\_subtemporal\_fenestra absent present;

{16 Interpterygoid\_fenestra,\_size smaller\_than\_subtemporal\_fenestra  
larger\_than\_subtemporal\_fenestra\_extremely\_reduced;

{17 Interpterygoid\_fenestra,\_shape compressed\_laterally broad,\_longer\_than\_wide  
compressed\_anteroposteriorly,\_wider\_than\_long round;

{18 Pterygoid\_fenestra absent\_present;

{19 Upper\_and\_lower\_jaw,\_marked\_gap\_during\_occlusion absent\_present;

{20 Upper\_and\_lower\_jaw,\_shape laterally\_compressed\_comparatively\_broad\_;

{21 Skull,\_main\_part\_of\_dorsal\_margin,\_curvature\_excluding\_cranial\_crest nearly\_straight  
concave\_convex;

{22 Length\_of\_the\_rostrum\_(pm-naof)\_relative\_to\_the\_skull\_length\_(pm-sq) reduced\_  
elongated\_(about\_or\_less\_than\_half\_of\_skull\_length)\_  
extremely\_elongated\_(more\_than\_half\_of\_skull\_length);

{23 Rostrum,\_anterior\_end,\_shape rounded pointed sharp\_tip flat\_surface;

{24 Rostral\_end\_of\_premaxillae/maxillae\_downturned absent\_present\_;

{25 Rostrum,\_distinct\_concavity\_on\_occlusal\_surface absent\_present;

{26 Rostrum,\_anterior\_portion\_forming\_a\_high\_ossified\_plate absent\_present;

{27 Rostrum,\_anterior\_tip\_with\_a\_slight\_dorsal\_reflection absent\_present;

{28 Premaxilla,\_anterior\_expansion absent\_present;

{29 Premaxilla,\_anterior\_expansion,\_shape\_in\_horizontal\_plane elliptical anteriorly\_expanded  
quadrangular absent;

{30 Premaxilla,\_posterior\_dorsal\_process,\_curved\_upward absent present;

{31 Premaxillae,\_anterior\_end\_rodlike absent present;

{32 Premaxillary\_process\_separating\_the\_external\_nares,\_thickness\_ wide narrow\_;

{33 Premaxilla,\_posterodorsal\_margin\_of\_nasoantorbital\_fenestra\_(including\_nasal),\_width\_ wide  
thin;

{34 Premaxillary\_sagittal\_crest absent present;

{35 Premaxillary\_sagittal\_crest\_position confined\_to\_the\_anterior\_portion\_of\_the\_skull\_  
starting\_anterior\_to\_the\_anterior\_margin\_of\_the\_nasoantorbital\_fenestra,\_extending\_beyond\_occipital\_region

starting\_at\_about\_the\_anterior\_margin\_of\_the\_nasoantorbital\_fenestra,\_reaching\_the\_skull\_roof\_above\_the\_orbit\_but\_not\_extending\_over\_the\_occipital\_region

starting\_close\_or\_at\_the\_anterior\_portion\_of\_the\_skull\_and\_extended\_over\_the\_occipital\_region

starting\_at\_the\_posterior\_half\_of\_the\_nasoantorbital\_fenestra

starting\_at\_the\_middle\_part\_of\_the\_nasoantorbital\_fenestra\_and\_extended\_over\_the\_occipital\_region absent;

{36 Premaxillary\_sagittal\_crest,\_shape striated,\_low\_with\_a\_nearly\_straight\_dorsal\_margin

striated,\_high\_with\_a\_nearly\_straight\_dorsal\_margin round\_dorsal\_margin,\_bladeshaped

smooth,\_expanded\_anteriorly\_and\_forming\_a\_low\_rod-like\_extension\_posteriorly

smooth,\_starting\_low\_anteriorly\_and\_very\_expanded\_posteriorly

striated,\_low,\_convex\_dorsal\_margin;

{37 Premaxillary\_crest,\_elongated\_dorsal\_premaxillary\_spike-like\_projection\_ absent\_ present\_;

{38 Premaxillary\_crest,\_distinct\_expansion\_on\_the\_anterior\_part\_ absent present;

{39 Premaxillary\_crest,\_concentric\_striae\_on\_the\_anterior\_region absent present;

{40 Premaxillary\_crest,\_anterior\_expansion\_of\_the\_anterior\_margin absent present;

{41 Maxilla,\_posterior\_ventral\_expansion\_ absent\_ present\_;

{42 Maxilla-nasal\_contact absent present;

{43 Maxilla-nasal\_contact,\_breadness broad narrow absent;

{44 Nasal\_descending\_process absent present;

{45 Nasal\_descending\_process,\_position\_ placed\_laterally placed\_medially absent;

{46 Nasal\_descending\_process,\_length\_  
long\_(almost\_reaching\_the\_\_ventral\_margin\_of\_the\_skull) short knob-like\_(extremely\_reduced)  
absent;

{47 Nasal\_descending\_process,\_orientation\_ inclined\_anteriorly subvertical absent;

{48 Nasal\_descending\_process,\_lateral\_foramen\_ absent\_ present\_;

{49 Lacrimal,\_extensive\_fenestration absent\_ present\_;

{50 Lacrimal,\_orbital\_process\_ absent\_ present\_;

{51 Jugal,\_lacrimal\_process\_base,\_width\_ broad narrow;

{52 Jugal,\_lacrimal\_process,\_inclination\_ inclined\_anteriorly subvertical inclined\_posteriorly;

{53 Jugal,\_presence\_of\_pronounced\_ridge\_on\_the\_lateral\_side absent present;

{54 Jugal,\_posterior\_process,\_orbital\_process absent present;

{55 Quadrate,\_inclination\_relative\_to\_ventral\_margin\_of\_skull\_ anteriorly subvertical  
inclined\_about\_120°\_posteriorly inclined\_about\_120°\_backwards\_ inclined\_about\_150°\_posteriorly;

{56 Cranio-mandibular\_articulation,\_position\_relative\_to\_orbit\_  
\_posterior\_to\_posterior\_margin\_of\_orbit under\_center\_of\_orbit\_  
under\_anterior\_margin\_of\_the\_orbit anterior\_to\_anterior\_margin\_of\_orbit;

{57 Helical\_jaw\_joint absent\_ present\_;

{58 Frontal,\_anterior\_portion\_rugose absent present;

{59 Frontal,\_ossified\_crest absent present;

{60 Frontal,\_ossified\_crest,\_position\_ confined\_to\_posterior\_end\_of\_skull starting\_above\_orbit  
starting\_on\_\_posterior\_half\_of\_nasoantorbital\_fenestra absent;

{61 Frontal,\_ossified\_crest,\_shape low,\_blunt short.\_spike-like,\_dorsally\_deflected spike-  
like,\_directed\_posteriorly narrow,\_broad,\_directed\_posteriorly low,\_broad\_base,\_fans-shaped  
high,\_broad\_base,\_crown-shaped high,\_broad\_base,\_casqued-shaped  
high,\_broad,\_directed\_posteriorly,\_at\_least\_doubling\_shight\_of\_skull\_above\_orbit absent;

{62 Parietal,\_ossified\_crest absent present;

{63 Parietal,\_ossified\_crest,\_shape\_ blunt\_  
constituting\_the\_base\_of\_the\_posterior\_portion\_of\_the\_cranial\_crest  
expanded,\_with\_rounded\_margin absent;

{64 Posterior\_region\_of\_the\_skull\_rounded\_with\_the\_squamosal\_displaced\_ventrally absent\_  
present\_;

{65 Supraoccipital does\_not\_extend\_backwards\_ extends\_backwards\_;

{66 Supraoccipital,\_foramen\_ absent\_ present\_;

{67 Paroccipital\_processes,\_expanded\_distal\_ends\_ absent\_ present\_;

{68 Foraminae\_piercing\_the\_anterior\_portion\_of\_the\_palate,\_numerous absent present;

{69 Palatal\_occlusal\_surface smooth discrete\_palatal\_ridge,\_tapering\_anteriorly\_  
strong\_palatal\_ridge,\_tapering\_anteriorly  
strong\_palatal\_ridge,\_confined\_to\_the\_posterior\_portion\_of\_the\_palate;

{70 Palate,\_dorsal\_deflection absent present;

{71

Palate,\_slight\_expansion\_close\_to\_the\_anterior\_margin\_of\_the\_nasoantorbital\_(or\_naris\_+\_antorb  
ital)\_fenestra absent present;

{72 Maxilla\_and\_internal\_naris,\_contact\_ absent\_ present\_;

{73 Palatines,\_shape\_ broad thin\_bars;

{74 Basisphenoid\_body,\_length\_ shorter\_than\_wide longer\_than\_wide;

{75 Mandibular\_rostral\_end,\_extension\_of\_the\_contact\_surface\_of\_opposing\_dentaries\_  
short,\_limited\_to\_the\_tip short,\_extended\_posteriorly\_less\_than\_30%\_of\_mandible\_length  
long,\_up\_to\_55%\_the\_mandible\_length long,\_extended\_over\_55%\_of\_mandible\_length;

{76 Mandibular\_rostral\_end,\_odontoid\_process absent present;

{77 Mandibular\_rostral\_end,\_opposing\_dentaries\_ unfused fused;

{78 Mandibular\_rostral\_end,\_shape rounded pointed sharp\_tip;

{79

Dentary,\_dorsal\_margin,\_distinct\_posterior\_eminence\_close\_to\_the\_separation\_of\_mandibular\_ra  
mi absent present;

{80 Tip\_of\_the\_dentary\_projected\_anteriorly absent\_present\_;

{81 Dentary\_ossified\_sagittal\_crest absent present;

{82 Dentary\_ossified\_sagittal\_crest,\_position\_ confined\_to\_the\_anterior\_third\_of\_the\_lower\_jaw  
extending\_close\_to\_the\_middle\_portion\_of\_the\_lower\_jaw absent;

{83 Dentary\_ossified\_sagittal\_crest,\_shape\_ shallow blade-like deep,\_broad\_in\_lateral\_view  
elongated\_ridge absent;

{84 Dentary,\_posteroventral\_fossa absent present;

{85 Teeth,\_position\_and\_presence present,\_evenly\_distributed\_along\_the\_jaws\_

teeth\_absent\_from\_the\_anterior\_portion\_of\_the\_jaws\_ confined\_to\_the\_anterior\_part\_of\_the\_jaws  
jaw\_toothless;

{86 Teeth,\_confined\_to\_the\_anterior\_part\_of\_the\_jaws absent

confined\_to\_the\_anterior\_half\_of\_the\_jaws confined\_to\_the\_anterior\_quarter\_of\_the\_jaws;

{87 Maxillary\_teeth,\_largest\_positioned\_posteriorly\_ absent\_present\_;

{88 Teeth,\_shape\_variation isodont heterodont;

{89 Teeth,\_anterior,\_height\_versus\_width\_proportion more\_than\_twice\_their\_width

less\_than\_twice\_their\_width;

{90 Teeth,\_anterior,\_marked\_variation\_in\_size absent present;

{91

Teeth,\_upper\_jaw,\_variation\_in\_the\_size\_of\_the\_anterior\_teeth\_with\_the\_5th\_and\_6th\_smaller\_than\_the\_4th absent\_present\_;

{92 Teeth,\_base\_broad\_and\_oval absent\_present\_;

{93 Teeth,\_serrated present absent;

{94 Teeth,\_cingulum absent present;

{95 Teeth,\_peg-like\_(cone-shaped) absent\_present\_;

{96 Teeth,\_small\_needle-shaped absent present;

{97 Teeth,\_labiolingually\_compressed\_crowns absent present;

{98 Teeth,\_labiolingually\_compressed\_crowns,\_compression not\_compressed slightly\_compressed strongly\_compressed;

{99 Teeth,\_sharp\_carinae absent present;

{100 Teeth,\_elongated absent present;

{101 Teeth,\_striated absent present;

{102 Teeth,\_curvature\_of\_the\_toothline absent present;

{103 Teeth,\_first\_pair\_above\_second\_pair absent present;

{104 Alveoli,\_lateral\_platform absent present;

{105 Atlas\_and\_axis unfused\_fused\_;

{106 Cervical\_vertebrae,\_postexapophyses\_ absent\_present\_;

{107 Mid-cervical\_vertebrae,\_centrum,\_lateral\_foramen\_ absent\_present\_;

{108 Mid-cervical\_vertebrae,\_length short,\_sub-equal\_in\_length\_  
longer\_than\_wide,\_with\_length\_less\_than\_3\_times\_width  
elongated,\_with\_length\_more\_than\_3\_times\_width extremely\_elongate;

{109 Mid-cervical\_vertebrae,\_ribs present\_absent\_;

{110 Mid-cervical\_vertebrae,\_neural\_spines,\_height\_ tall low extremely\_reduced\_or\_absent;

{111 Mid-cervical\_vertebrae,\_neural\_spines,\_shape\_ blade-shaped spike-shaped\_ ridge;

{112 Notarium absent\_present\_;

{113 Caudal\_vertebrae,\_quantity\_ more\_than\_15\_ 15\_or\_less\_;

{114 Caudal\_vertebrae,\_zygapophyses\_forming\_rod-like\_ossified\_processes\_ absent present;

{115 Proximal\_caudal\_vertebrae\_centrum,\_centrum\_shape\_ single duplex;

{116 Scapula,\_length\_relative\_to\_coracoid\_length subequal\_or\_longer\_than\_coracoid\_  
scapula\_shorter\_than\_coracoid\_(1\_>\_sca/cor\_>\_0.80)\_  
substantially\_shorter\_than\_coracoid\_(sca/cor\_<\_0.80);

{117 Scapula,\_proximal\_end\_ elongated\_ sub-oval\_;

{118 Scapula,\_shape\_ elongated\_ stout,\_with\_constructed\_shaft\_;

{119 Coracoid,\_proximal\_end,\_shape flattened oval;

{120 Coracoid,\_sternal\_articulation\_ no\_developed\_articulation  
articulation\_surface\_straight\_or\_slightly\_concave articulation\_surface\_strongly\_concave;

{121 Coracoid,\_sternal\_articulation,\_posterior\_expansion\_ absent present;

{122 Coracoid,\_ventral\_margin,\_deep\_flange absent present;

{123 Coracoid,\_broad\_tubercle\_on\_ventroposterior\_margin absent present;

{124 Cristospine,\_shape absent\_ shallow\_and\_elongated\_ deep\_and\_short;

{125 Humerus,\_proportional\_length\_relative\_to\_the\_metacarpal\_IV\_(hu/mcIV)\_  
hu/mcIV\_>\_2.50\_ 1.50\_<\_hu/mcIV\_<\_2.50\_ 0.40\_<\_hu/mcIV\_<\_1.50 hu/mcIV\_<\_0.40;

{ 126 Humerus, \_proportional\_length\_relative\_to\_the\_femur\_(hu/fe)\_ hu/fe\_<0.80\_

1.4\_>\_hu/fe>\_\_0.80\_ hu/fe\_>\_1.40;

{ 127 Humerus\_plus\_ulna, \_proportional\_lengths\_relative\_to\_the\_femur\_plus\_tibia\_(hu+ul/fe+ti)\_

humerus\_plus\_ulna\_about\_0.80%\_or\_less\_of\_femur\_plus\_tibia\_length\_(hu+ul/fe+ti\_<\_0.80)\_

humerus\_plus\_ulna\_larger\_than\_0.80%\_of\_femur\_plus\_tibia\_length\_(hu+ul/fe+ti\_>\_0.80)\_;

{ 128 Humerus, \_proximal\_end, \_small\_foramen\_on\_dorsal\_surface\_distal\_to\_proximal\_articulation

absent present;

{ 129 Humerus, \_proximal\_end, \_foramen\_on\_ventral\_surface\_close\_to\_proximal\_margin\_ absent\_

present\_;

{ 130 Humerus, \_deltopectoral\_crest, \_shape\_ reduced, \_positioned\_close\_to\_the\_humerus\_shaft

enlarged, \_proximally\_placed, \_with\_almost\_straight\_proximal\_margin\_

enlarged, \_hatchet\_shaped, \_proximally\_placed

enlarged, \_hatched\_shaped, \_positioned\_further\_down\_the\_humerus\_shaft enlarged, \_warped

long, \_proximally\_placed, \_curving\_ventrally;

{ 131 Humerus, \_medial\_(= \_ulnar)\_crest reduced\_ directed\_posteriorly\_

massive, \_with\_a\_developed\_proximal\_ridge;

{ 132 Humerus, \_distal\_articulation, \_shape\_ oval\_or\_D-shaped\_ subtriangular\_;

{ 133 Humerus, \_between\_distal\_condyles, \_pneumatic\_foramen absent present;

{ 134 Ulna, \_proportional\_length\_relative\_to\_metacarpal\_IV\_(ul/mcIV)\_

ulna\_3.6\_times\_longer\_than\_metacarpal\_IV\_(ul/mcIV\_>\_3.6)\_

length\_of\_ulna\_between\_3.6\_and\_two\_times\_the\_length\_of\_metacarpal\_IV\_(3.6\_>ul/mcIV>2)\_

ulna\_between\_double\_and\_the\_same\_length\_of\_metacarpal\_IV\_(2>ul/mcIV>1)

ulna\_the\_same\_size\_or\_smaller\_than\_metacarpal\_IV\_(ul/mcIV\_<\_1);

{ 135 Ulna\_and\_radius, \_diameter\_at\_midshaft\_ subequal\_

diameter\_of\_radius\_about\_half\_that\_of\_ulna diameter\_of\_radius\_less\_than\_half\_that\_of\_ulna;



{136 Proximal\_syncarpal,\_large\_posterodistal\_process absent present;

{137 Proximal\_syncarpal,\_shape\_(proximal\_view) quadrangular\_or\_irregular pentagonal;

{138 Distal\_syncarpals,\_shape\_(distal\_view)\_ irregular form\_rectangular\_unit\_

form\_triangular\_unit;

{139 Pteroid absent\_ shorter\_than\_half\_the\_length\_of\_the\_ulna\_

longer\_than\_half\_the\_length\_of\_the\_ulna;

{140 Pteroid,\_proximal\_articulation,\_expanded\_in\_right\_angle\_with\_shaft absent present;

{141 Metacarpals\_I\_-III,\_relation\_with\_carpus\_ articulating\_with\_carpus\_

metacarpal\_I\_articulates\_with\_carpus,\_metacarpals\_II\_and\_III\_reduced\_

not\_articulating\_with\_carpus;

{142

Manual\_digit\_IV\_first\_phalanx,\_proportional\_length\_relative\_to\_metacarpal\_IV\_(ph1d4/mcIV)\_

both\_small\_and\_reduced\_  $ph1d4/mcIV > 4.0$   $4.0 > ph1d4/mcIV > 2.0$   $2.0 > ph1d4/mcIV > 1.0$

' $ph1d4/mcIV < 1.0$ ';

{143 Manual\_digit\_IV\_first\_phalanx,\_proportional\_length\_relative\_to\_tibiotarsus\_(ph1d4/ti)\_

ph1d4\_reduced\_

ph1d4\_elongated\_and\_less\_than\_twice\_the\_length\_of\_ti\_( $ph1d4/ti$ \_smaller\_than\_2.00)

ph1d4\_elongated\_about\_or\_longer\_than\_twice\_the\_length\_of\_ti\_( $ph1d4/ti$ \_subequal/larger\_than\_2

.00);

{144

Manual\_digit\_IV\_second\_phalanx,\_proportional\_length\_relative\_to\_first\_phalanx\_(ph2d4/ph1d4)\_

both\_short\_or\_absent\_

elongated\_with\_second\_phalanx\_about\_the\_same\_size\_or\_longer\_than\_first\_( $ph2d4/ph1d4$ \_larger

\_than\_1.00)\_

elongated\_with\_second\_phalanx\_up\_to\_30%\_shorter\_than\_first\_( $ph2d4/ph1d4$ \_between\_0.70\_-

\_1.00)

elongated\_with\_second\_phalanx\_more\_than\_30%\_shorter\_than\_first\_(ph2d4/ph1d4\_smaller\_than\_0.70);

{ 145

Manual\_digit\_IV\_third\_phalanx,\_proportional\_length\_relative\_to\_first\_phalanx\_(ph3d4/ph1d4)\_both\_short\_or\_absent\_ph3d4\_about\_the\_same\_length\_or\_larger\_than\_ph1d4\_ph3d4\_shorter\_than\_ph1d4;

{ 146

Manual\_digit\_IV\_third\_phalanx,\_proportional\_length\_relative\_to\_the\_second\_phalanx\_(ph3d4/ph2d4)\_both\_short\_or\_absent\_ph3d4\_about\_the\_same\_size\_or\_longer\_than\_ph2d4\_ph3d4\_shorter\_than\_ph2d4;

{ 147

Proportional\_length\_of\_the\_forth\_phalanx\_of\_manual\_digit\_IV\_relative\_to\_the\_first\_phalanx\_of\_manual\_digit\_IV\_(ph4d4/ph1d4) both\_short\_or\_absent

both\_elongated,\_with\_the\_forth\_phalanx\_longer\_than\_the\_first\_(ph4/d4>1.00)

both\_elongated,\_with\_the\_forth\_phalanx\_the\_same\_length\_or\_shorter,\_but\_longer\_than\_35%\_the\_length\_of\_the\_first

both\_elongated,\_with\_the\_forth\_phalanx\_less\_than\_35%\_the\_length\_of\_the\_first;

{ 148 Femur,\_length\_relative\_to\_metacarpal\_IV\_length\_(fe/mcIV)\_

femur\_at\_least\_twice\_the\_metacarpal\_IV\_length\_(fe?\_mcIV\_>\_2.00)

femur\_longer\_but\_less\_than\_twice\_the\_length\_of\_metacarpal\_IV\_(1.00\_<\_fe/mcIV\_<\_2.00)\_

femur\_about\_the\_same\_length\_or\_shorter\_than\_metacarpal\_IV\_(fe/mcIV\_<\_1.00);

{ 149 Metatarsal\_III,\_proportional\_length\_relative\_to\_tibia\_length\_

more\_than\_30%\_of\_tibia\_length\_less\_than\_30%\_of\_tibia\_length\_;

```
{150 Pedal_digit_V,_number_of_phalanges_ with_four_phalanges_ with_2_phalanges_
with_1_or_no_phalanx_(extremely_reduced);
```

```
{151 Pes,_second_phalanx_of_digit_V,_shape_ reduced_or_absent_ elongated,_straight_
elongated,_curved elongated,_very_curved_(boomerang_shape);
```

```
;
```

```
proc /;
```
